# Supplementary material
Source: HighWire-hosted journal article supplement (https://erj.ersjournals.com/content/51/2/1701330)
Supplement: inline-supplementary-material-1 [file inline-supplementary-material-1.pdf]

|               |                      | SCT |       | Controls |       | Emphysema |       | Fibrosis  |       | CF/NCFB   |       | Other     |       |
|---------------|----------------------|-----|-------|----------|-------|-----------|-------|-----------|-------|-----------|-------|-----------|-------|
| Patients      |                      |     |       |          |       |           |       |           |       |           |       |           |       |
|               | Pre-matching, N (%)  | 105 |       | 9,895    |       | 4014 (41) |       | 2368 (24) |       | 1815 (18) |       | 1698 (17) |       |
|               | Post-matching, N (%) | 105 |       | 4,075    |       | 1183 (29) |       | 911 (22)  |       | 1303 (32) |       | 678 (17)  |       |
|               | Male, N (%)          | 66  | (63)  | 2381     | (58)  | 726       | (61)  | 626       | (68)  | 695       | (53)  | 334       | (49)  |
|               | Age LTx, years       | 31  | 21-43 | 43       | 27-54 | 55        | 49-59 | 50        | 41-58 | 26        | 21-33 | 34        | 23-46 |
|               | DLTx, N (%)          | 89  | (85)  | 3268     | (80)  | 789       | (67)  | 604       | (66)  | 1272      | (98)  | 603       | (89)  |
| Status at LTx |                      |     |       |          |       |           |       |           |       |           |       |           |       |
|               | Elective, N (%)      | 67  | (64)  | 2919     | (72)  | 1055      | (89)  | 620       | (68)  | 807       | (62)  | 437       | (64)  |
|               | Urgent, N (%)        | 15  | (14)  | 127      | (3)   | 35        | (3)   | 33        | (4)   | 44        | (3)   | 15        | (2)   |
|               | High-Urgent, N (%)   | 23  | (22)  | 1029     | (25)  | 93        | (8)   | 258       | (28)  | 452       | (35)  | 226       | (34)  |

**Table S1:** Summary of the control cohort. Demographic data relates to matched controls only. Values are median [interquartile range]

unless otherwise stated. Key: LTx: lung transplantation; DLTx: bilateral lung transplantation; SCT: allogeneic stem cell transplant; CF: cystic fibrosis; NCFB: non-cystic fibrosis bronchiectasis.

| Early Sepsis Risk                  | N   | Proportional Hazard | Univariate Analysis |              |       | Multivariate Analysis |              |        |
|------------------------------------|-----|---------------------|---------------------|--------------|-------|-----------------------|--------------|--------|
|                                    |     |                     | HR                  | (95% CI)     | p     | HR                    | (95% CI)     | p      |
| Demographics                       |     |                     |                     |              |       |                       |              |        |
| Male                               | 66  | 0.73                | 1.08                | (0.96-1.21)  | 0.21  | 4.26                  | (1.01-17.97) | 0.04   |
| Never-Smoker                       | 89  | 0.20                | 1.13                | (0.89-1.45)  | 0.18  |                       |              |        |
| Age per 10y increase               | 105 | 0.11                | 1.14                | (0.83-1.57)  | 0.41  |                       |              |        |
| FEV <sub>1</sub> per 10% pred loss | 105 | 0.68                | 1.36                | (1.02-3.31)  | 0.03  |                       |              |        |
| FVC per 10% pred loss              | 105 | 0.38                | 3.61                | (1.32-13.91) | 0.01  |                       |              |        |
| FEV <sub>1</sub> /FVC ≥0.7         | 92  | 0.83                | 2.52                | (1.71-4.63)  | 0.05  |                       |              |        |
| TLC ≤90% predicted                 | 16  | 0.91                | 0.67                | (0.14-3.14)  | 0.61  |                       |              |        |
| Isolated BO on CT                  | 54  | 0.55                | 0.58                | (0.16-2.06)  | 0.40  |                       |              |        |
| Colonized                          | 39  | 0.25                | 1.82                | (0.29-14.59) | 0.57  |                       |              |        |
| - <i>PsA</i>                       | 20  | 0.46                | 1.38                | (0.09-22.03) | 0.82  |                       |              |        |
| - <i>Aspergillus</i>               | 8   | 0.99                | 1.13                | (0.84-1.42)  | 0.98  |                       |              |        |
| eGFR <90ml/min                     | 65  | 0.57                | 3.77                | (1.03-14.55) | 0.04  |                       |              |        |
| Primary Diagnosis                  |     |                     |                     |              |       |                       |              |        |
| AML                                | 38  | 0.89                | 0.93                | (0.83-1.04)  | 0.32  |                       |              |        |
| ALL                                | 16  | 0.65                | 4.61                | (1.34-18.74) | 0.02  |                       |              |        |
| CML                                | 18  | 0.19                | 1.23                | (0.24-6.36)  | 0.68  |                       |              |        |
| CLL                                | 2   | 0.98                | 1.83                | (0.46-7.31)  | 0.18  |                       |              |        |
| NHL                                | 6   | 0.54                | 1.37                | (0.18-10.79) | 0.19  |                       |              |        |
| HL                                 | 6   | 0.99                | 0.90                | (0.84-1.04)  | 0.59  |                       |              |        |
| MDS                                | 7   | 1.00                | 0.93                | (0.81-1.12)  | 0.54  |                       |              |        |
| Benign                             | 12  | 0.99                | 0.89                | (0.73-1.02)  | 0.42  |                       |              |        |
| Stem Cell Transplant               |     |                     |                     |              |       |                       |              |        |
| BMT                                | 51  | 0.31                | 0.55                | (0.16-1.95)  | 0.35  |                       |              |        |
| Multiple SCT                       | 6   | 1.00                | 1.10                | (0.84-1.21)  | 0.59  |                       |              |        |
| SCT-LTx 2yrs                       | 15  | 0.32                | 2.12                | (0.55-8.19)  | 0.28  |                       |              |        |
| Myeloablation                      | 87  | 0.71                | 2.82                | (0.35-22.55) | 0.33  |                       |              |        |
| - <i>Busulphan</i>                 | 32  | 0.46                | 1.06                | (0.15-7.54)  | 0.95  |                       |              |        |
| - <i>Cyclophosphamide</i>          | 47  | 0.97                | 1.85                | (0.31-11.09) | 0.48  |                       |              |        |
| Total Body Irradiation             | 46  | 0.23                | 2.97                | (0.62-14.43) | 0.17  |                       |              |        |
| Extra-Pulmonary GvHD               |     |                     |                     |              |       |                       |              |        |
| GvHD Skin                          | 52  | 0.99                | 1.02                | (0.27-3.86)  | 0.98  |                       |              |        |
| GvHD GI                            | 31  | 0.90                | 0.76                | (0.19-3.01)  | 0.70  |                       |              |        |
| GvHD Eye                           | 33  | 0.64                | 3.35                | (0.43-26.17) | 0.43  |                       |              |        |
| GvHD Mucosa                        | 43  | 0.51                | 1.20                | (0.30-4.77)  | 0.79  |                       |              |        |
| Calcineurin Inhibitor <6mts        | 75  | 0.57                | 3.26                | (0.78-13.67) | 0.11  |                       |              |        |
| Mycophenolate <6mts                | 31  | 0.35                | 0.94                | (0.23-3.95)  | 0.94  |                       |              |        |
| Systemic Steroids <6mts            | 68  | 0.63                | 1.27                | (0.26-6.29)  | 0.77  |                       |              |        |
| Peri-LTx Treatment                 |     |                     |                     |              |       |                       |              |        |
| DLTx                               | 89  | 0.87                | 0.54                | (0.12-2.44)  | 0.35  |                       |              |        |
| Induction                          | 35  | 0.30                | 0.83                | (0.21-3.29)  | 0.79  |                       |              |        |
| Inpatient at LTx                   | 38  | 0.19                | 4.93                | (1.24-19.07) | 0.012 |                       |              |        |
| ICU                                | 23  | 0.92                | 4.37                | (1.27-15.12) | 0.02  | 5.19                  | (1.15-23.43) | 0.03   |
| MV                                 | 14  | 0.44                | 6.41                | (1.85-22.23) | 0.003 | 6.92                  | (1.03-46.71) | <0.001 |
| ECMO                               | 5   | 0.68                | 5.39                | (1.14-25.54) | 0.05  |                       |              |        |
| Dual Bridging                      | 4   | 0.55                | 13.01               | (5.67-56.19) | 0.007 | 7.79                  | (6.17-98.31) | 0.001  |

**Table S2:** Uni- and multivariate Cox regression analysis assessing risk factors for early sepsis (≤12 months) after lung transplantation (LTx). Hazard ratio (HR) with 95% confidence intervals (95%CI). Key: FEV<sub>1</sub> – forced expiratory volume in 1s, FVC – forced vital capacity, TLC – total lung capacity, BO – bronchiolitis obliterans, CT – computerized tomography, PsA – *Pseudomonas aeruginosa*, GFR – estimated glomerular filtration rate (calculated using CKD-EPI), AML: acute myeloid leukemia; ALL: acute lymphoblastic leukemia; CML: chronic myeloid leukemia; CLL: chronic lymphocytic leukemia; NHL – non-Hodgkin lymphoma, HL – Hodgkin lymphoma, MDS – myelodysplastic syndrome, BMT – bone marrow transplantation, SCT – stem cell transplantation, TBI – total body irradiation, GvHD – graft vs. host disease, ICU – intensive care unit, MV – mechanical ventilation and ECMO – extracorporeal membranous oxygenation.
